# Supplementary material for: Modifying perovskite solar cells with l(+)-cysteine at the interface between mesoporous TiO2 and perovskite
Source: Royal Society of Chemistry journal article supplement (doi:10.1039/c9se00963a), 2019-12-02
Supplement: c9se00963a1.pdf [file c9se00963a1.pdf]

Supporting information for:

# Modifying Perovskite Solar Cells with L(+)- cysteine at the Interfaces between Mesoporous TiO<sub>2</sub> and Perovskite

Pengfei Wu, Baohua Zhao, Xiaotong Ma, Chengben Liu, Yanli Chen, Guangwu  
Yang\*, Xiyu Li\*

School of Materials Science and Engineering, Institute of New Energy, College of  
Science, China University of Petroleum (East China), Qingdao, 266580, China

## **Experimental section**

### **Materials**

All chemicals and reagents were used as received without any further purification. Substrates are fluorine-doped tin oxide (FTO) conducting glass, which were washed sequentially in an ultrasonic bath with KOH/isopropyl alcohol-saturated solution, distilled water, acetone, and ethanol alcohol.

### **Measurements**

Absorption spectra were recorded on a U-3900 UV-vis spectrophotometer (Japan Hitachi). Steady-state and time-resolved photoluminescence (PL) spectra were taken using a fluorescence spectrometer (FLS980, Edinburgh, England). IR spectra were recorded by using a Spectrum One instrument (German Perkinelmer). Laboratory powder X-ray diffraction patterns were collected on a Rigaku Ultima IV X-ray diffractometer with a Cu K $\alpha$  source (40 kV, 40 mA). The morphology of the samples were observed on a field-emission scanning electron microscope (SEM, Quant 250FEG) equipped with an energy-dispersive X-ray (EDX) detector. The contact angle was measured on an OCA20 contact angle measuring instrument (Dataphysics, Germany). Current-voltage (I-V) data of PSCs and electrochemical impedance spectroscopy (EIS) were collected on an electrochemical workstation (CHI-760) in solar plot mode under xenon lamp irradiation. The xenon lamp used in the measurement was calibrated by a commercial standard Si cell (Newport). The external quantum efficiencies (EQEs) were detected by the dual phase lock-in amplifier (SR830) and the grating spectrometer (Omni- $\lambda$ 300).

### **Solar cell fabrication**

Fluorine-doped tin oxide (FTO) glass substrates with dimension of 1.75 cm  $\times$  1.2 cm were patterned by etching with zinc powder and 2M hydrochloric acid. The precursor solution of the block TiO $_2$  layer (bl-TiO $_2$ ) composed of 1-butanol and titanium diisopropoxide bis(acetylacetonate). The bl-TiO $_2$  was applied to FTO by spin-

coating at 3000 rpm for 20 s and sintered at 500 °C for 30 min. The mp-TiO<sub>2</sub> (18NR-T TiO<sub>2</sub> paste, purity >99%) was then coated at 4000 rpm for 30 s and annealed at 500 °C for 30 min. For the perovskite layer, a precursor solution composed of CH<sub>3</sub>NH<sub>3</sub>I, PbI<sub>2</sub> and PbCl<sub>2</sub> in a molar ratio of 4:1:1 with N,N-dimethylformamide as solvent was spin-coated at 4000 rpm for 30 s and then annealed at 100 °C for 60 min. Spiro-OMeTAD as hole transport layer, was subsequently deposited following the literature method.<sup>37</sup> Finally, 80 nm thick Au as a counter electrode was deposited. The active area of fabricated PSCs is 0.06 cm<sup>2</sup>

### **L-cy modification onto mp-TiO<sub>2</sub> surface**

The as-obtained FTO/bl-TiO<sub>2</sub>/ mp-TiO<sub>2</sub> substrate was dipped into different L-cy solutions (solvent: methyl alcohol, ethyl alcohol, isopropanol and water) with a series L-cy concentration (0.5 mM, 1 mM and 1.5 mM) at room temperature for a certain time (0.5h, 1h, 1.5h, 2h), and then the substrates were washed thoroughly by absolute ethanol three times to remove physically absorbed L-cy molecules. Finally they were dried at 353 K in a vacuum oven for 90 min.

### **The Young's equation**

When dropping liquid on a solid substrate, there will be a certain angel at the line of three-phase contact described by one of the mostly used physical equations, namely Young's equation(1)

$$\cos\theta\gamma_{lv} = \gamma_{sv} - \gamma_{sl} \quad (1)$$

where  $\gamma_{lv}$  is liquid surface energy,  $\gamma_{sv}$  is solid surface energy and  $\gamma_{sl}$  is solid-liquid surface energy. According to the equation, it is clear understood that when  $\gamma_{lv}$  is the same as  $\gamma_{sl}$ , the solid energy will go up with the contact angels decreasing. The contact angels between different thiadiazole derivatives containing perovskite films and DMF were investigated.

**Table 1S** The contact angle and solid interface energy for droplets of DMF on bare and L-cy modified mp-TiO<sub>2</sub> substrate

|                            | bare mp-TiO <sub>2</sub> | L-cy modified mp-TiO <sub>2</sub> |
|----------------------------|--------------------------|-----------------------------------|
| The contact angel          | 17°                      | 7.9°                              |
| The solid interface energy | 35.73 mN/m               | 37.04 mN/m                        |

**Table 2S** Fitting parameters used in the equivalent circuit modeling of impedance spectra of the devices based on bare mp-TiO<sub>2</sub> and L-cy modified mp-TiO<sub>2</sub>

|                     | Device based on bare mp-TiO <sub>2</sub> | Device based on L-cy modified mp-TiO <sub>2</sub> |
|---------------------|------------------------------------------|---------------------------------------------------|
| R <sub>s</sub> (Ω)  | 19.68                                    | 19.44                                             |
| R <sub>ct</sub> (Ω) | 129.8                                    | 116.0                                             |

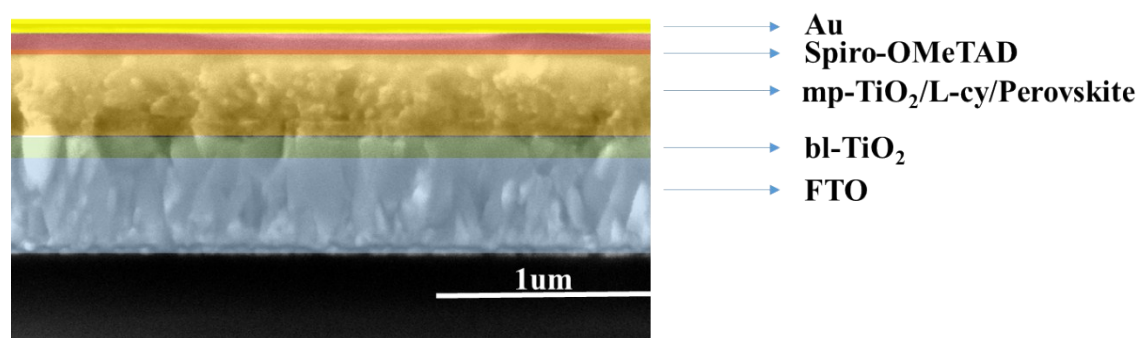

**Fig. 1S** The cross-section SEM image of the device with L-cy modified mp-TiO<sub>2</sub> containing the FTO cathode and Au anode.

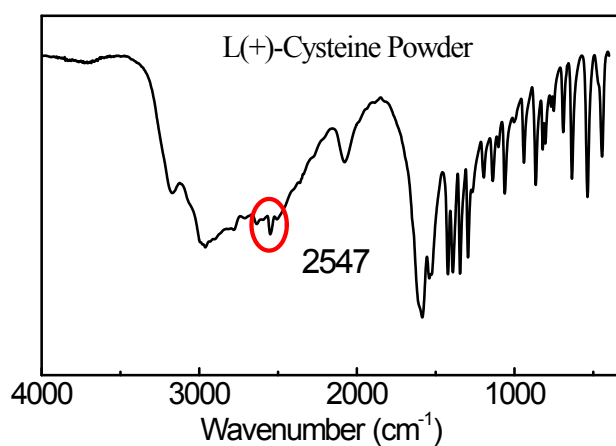

**Fig. 2S** The FTIR spectra of the L-cy powder.

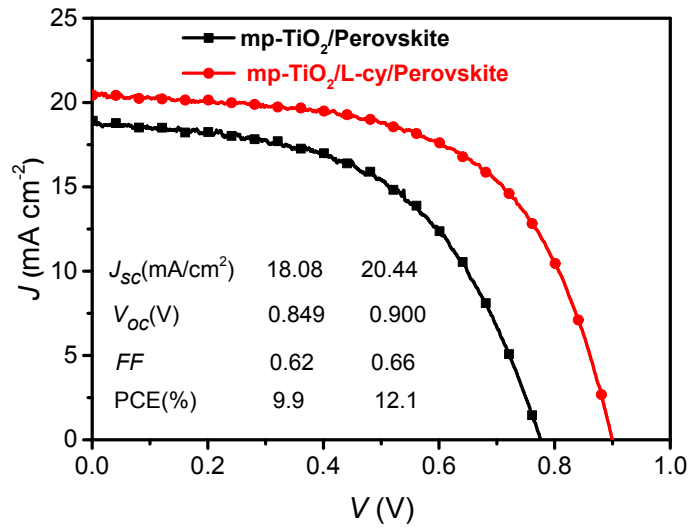

**Fig. 3S**  $J$ - $V$  curves for the champion devices (1 cm<sup>2</sup>) based on bare mp-TiO<sub>2</sub> and on modified mp-TiO<sub>2</sub>.

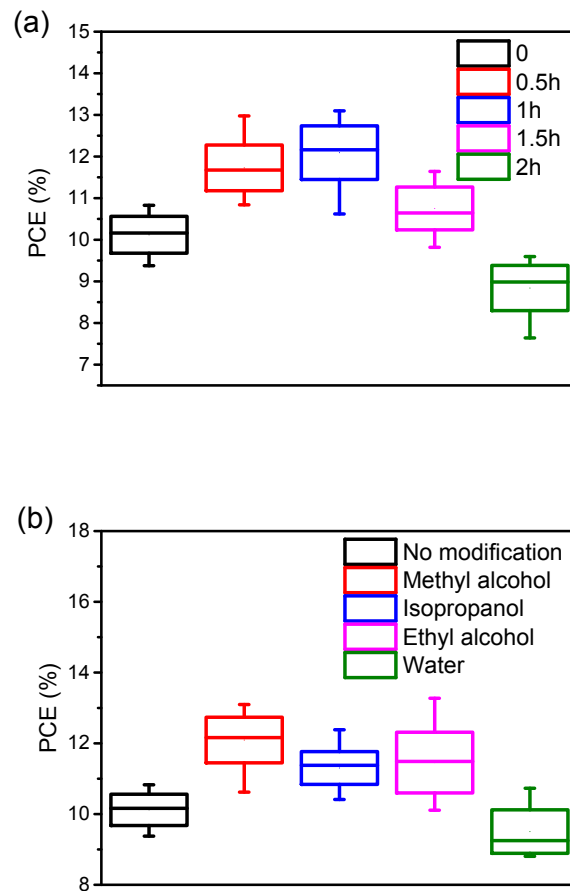

**Fig. 4S** Histograms of PCE for the devices based on L-cy modified mp-TiO<sub>2</sub>: (a) with

different dipping time; (b) in different solvents.

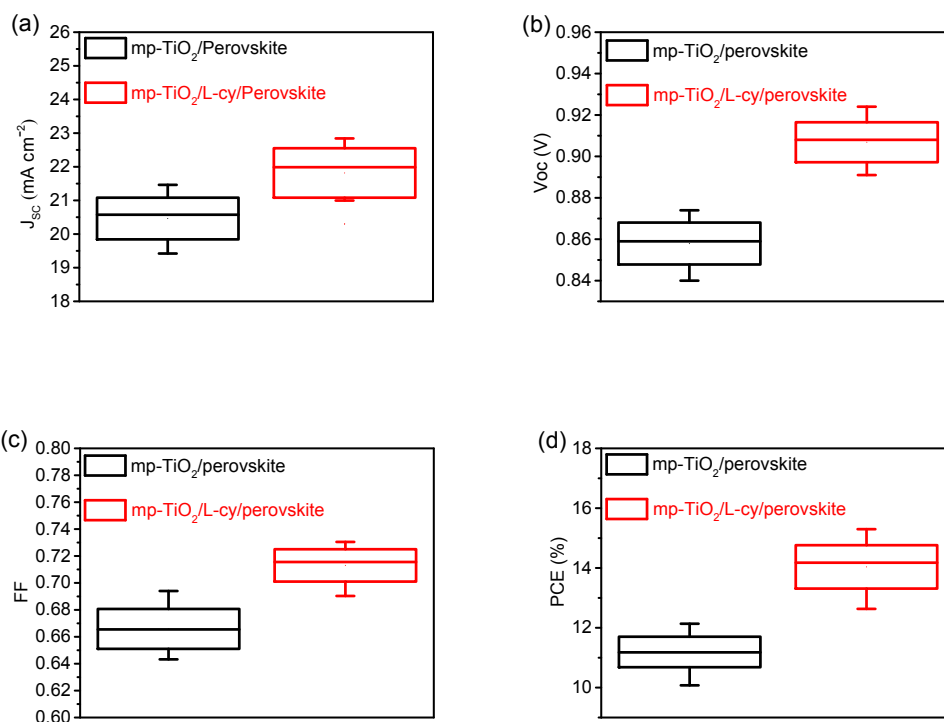

**Fig. 5S** Histograms of (a)  $J_{sc}$ ; (b)  $V_{oc}$ ; (c)  $FF$ ; (d) PCE for the devices based on bare mp-TiO<sub>2</sub> and on L-cy modified mp-TiO<sub>2</sub>.

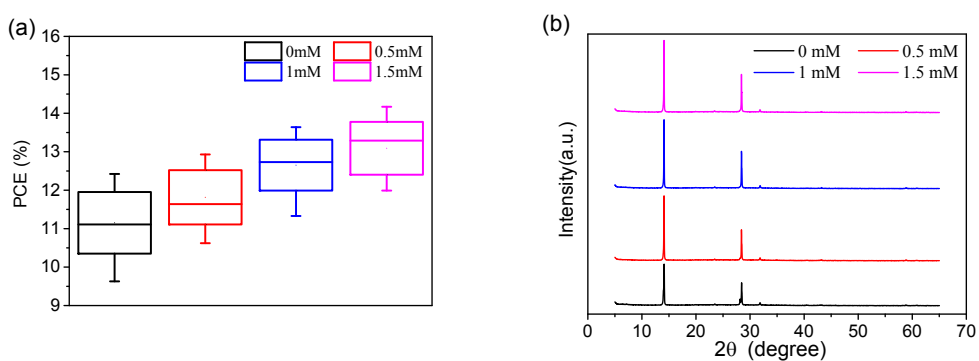

**Fig. 6S** (a) Histograms of PCE for the devices and; (b) XRD patterns of perovskite film based on bare mp-TiO<sub>2</sub> and on TiO<sub>2</sub> modified with different concentration methanol solutions.

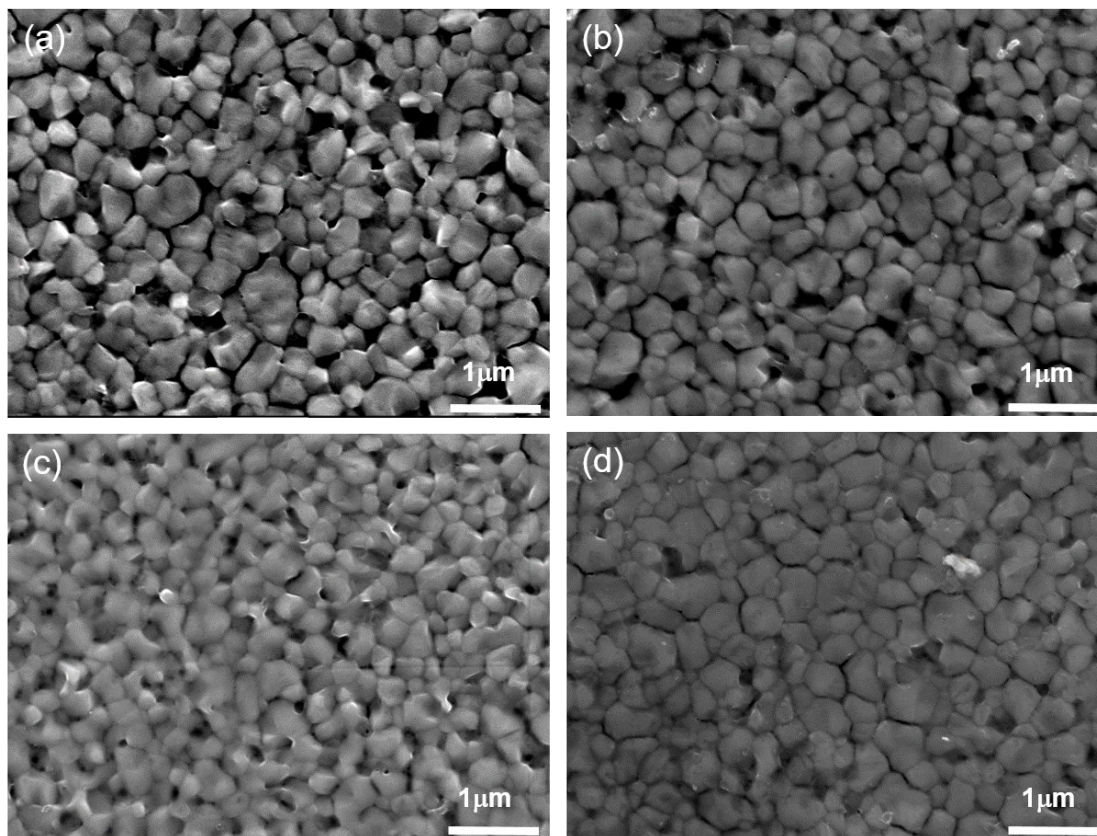

**Fig. 7S** Perovskite films on  $\text{TiO}_2$  modified with different concentration methanol solution: (a) 0 mM; (b) 0.5 mM; (c) 1 mM; (d) 1.5 mM.

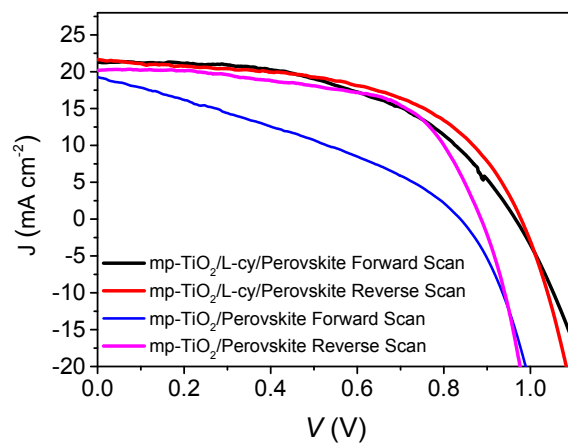

**Fig. 8S** Forward and reverse  $J$ - $V$  curves for the champion devices based on bare  $\text{mp-TiO}_2$  and on L-cy modified  $\text{mp-TiO}_2$ .
